# Supplementary material
Source: publisher figshare collection journal article supplement (https://karger.figshare.com/ndownloader/files/25277735)
Supplement: Supplementary file 1 [file 25277735]

Supplemental table 1. Longitudinal results of indicators of dialysis efficiency

| ***Parameter/Time*** | **Baseline** | **6 Months** | **12 Months** | **18 Months** | **24 Months** |
| --- | --- | --- | --- | --- | --- |
| *B2-M, mg/L* | 17.46 ± 7.43 | 19.52 ± 7.95 | 21.52 ± 11.10 | 26.50 ± 15.57 | 23.35 ± 10.79 |
| *Sodium, mmol/L* | 138.74 ± 7.32 | 138.03 ± 2.91 | 137.96 ± 2.59 | 138.52 ± 3.33 | 138.00 ± 3.00 |
| *Urea, mmol/L* | 16.9 ± 4.65 | 18.01 ± 5.56 | 17.15 ± 4.22 | 16.12 ± 4.51 | 16.00 ± 4.78 |
| *Calcium, mmol/L* | 2.56 ± 1.58 | 2.30 ± 0.15 | 2.29 ± 0.12 | 2.31 ± 0.18 | 2.30 ± 0.12 |
| *Potassium, mmol/L* | 4.78 ± 0.59 | 4.90 ± 0.70 | 4.95 ± 0.56 | 4.81 ± 0.57 | 5.17 ± 0.59 |
| *Residual urine output, ml/24 h* | 1424.77 ± 624.35 | 1324.32 ± 1121.55 | 1154.21 ± 639.40 | 1345.36 ± 639.71 | 1143.38 ± 450.63 |
| *Phosphate, mmol/L* | 1.42 ± 0.38 | 1.56 ± 0.40 | 1.57 ± 0.51 | 1.48 ± 0.35 | 1.50 ± 0.40 |
| *Kt/V* | 1.96 ± 0.71 | 1.92 ± 0.75 | 1.80 ± 0.60 | 1.55 ± 0.44 | 1.65 ± 0.40 |
| *BP systolic/diastolic, mmHg* | 148/80 ± 25/12 | 146/79 ± 26/12 | 151/81 ± 31/15 | 147/79 ± 29/12 | 146/75 ± 27/10 |
| *Weight, Kg* | 81.0 ± 16.08 | 79.39 ± 15.46 | 78.86 ± 14.77 | 77.23 ± 14.0 | 76.63 ± 14.61 |

Data are given in mean ± SD. B2-M, Beta2-microglobuline; BP, Blood pressure; Kg, kilogram
